# Supplementary material
Source: Royal Society of Chemistry journal article supplement (doi:10.1039/d5fo05373k)
Supplement: d5fo05373k1.pdf [file d5fo05373k1.pdf]

## Supplementary information

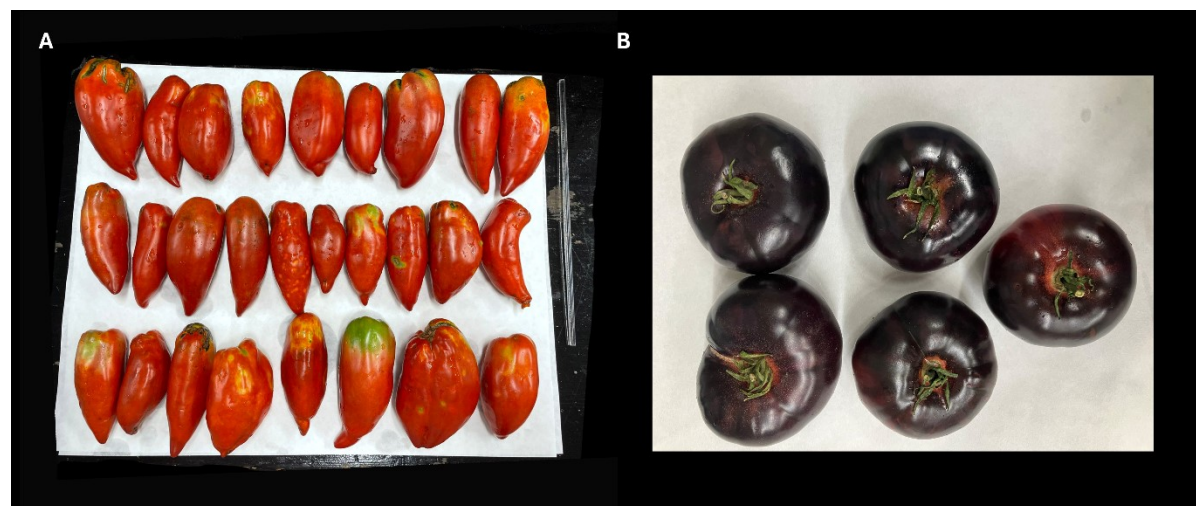

*Figure 1. Tomatoes used without thermal processing. A. Cuban Pepper variety, B. Mar Azul variety.*

Table 1. Pairwise comparisons with Tukey-adjusted estimated marginal means.

| Compound                          | Tomato comparison |              | Mean difference<br>( $\mu\text{g}/\text{mg}$ extract) | 95% CI Lower | 95% CI Upper | p-value |
|-----------------------------------|-------------------|--------------|-------------------------------------------------------|--------------|--------------|---------|
| 4-Caffeoylquinic acid             | Mar Azul          | Tomato paste | 0.56                                                  | 0.52         | 0.60         | <0.001  |
| 4-Caffeoylquinic acid             | Mar Azul          | Cuban Pepper | 0.35                                                  | 0.31         | 0.39         | <0.001  |
| 4-Caffeoylquinic acid             | Tomato paste      | Cuban Pepper | -0.21                                                 | -0.25        | -0.17        | <0.001  |
| 5-Caffeoylquinic acid             | Mar Azul          | Tomato paste | 0.76                                                  | 0.73         | 0.79         | <0.001  |
| 5-Caffeoylquinic acid             | Mar Azul          | Cuban Pepper | 0.49                                                  | 0.47         | 0.52         | <0.001  |
| 5-Caffeoylquinic acid             | Tomato paste      | Cuban Pepper | -0.26                                                 | -0.29        | -0.24        | <0.001  |
| Ferulic acid                      | Mar Azul          | Tomato paste | 0.009                                                 | 0.008        | 0.01         | <0.001  |
| Caffeic- <i>O</i> -glucoside      | Mar Azul          | Tomato paste | 0.003                                                 | 0.002        | 0.003        | <0.001  |
| Caffeic- <i>O</i> -glucoside      | Mar Azul          | Cuban Pepper | 0.002                                                 | 0.002        | 0.003        | <0.001  |
| Caffeic- <i>O</i> -glucoside      | Tomato paste      | Cuban Pepper | -0.0002                                               | -0.0010      | 0.0006       | 0.74    |
| Ferulic acid                      | Mar Azul          | Cuban Pepper | 0.0005                                                | -0.001       | 0.002        | 0.68    |
| Ferulic acid                      | Tomato paste      | Cuban Pepper | -0.009                                                | -0.01        | -0.007       | <0.001  |
| Naringenin-7- <i>O</i> -glucoside | Mar Azul          | Tomato paste | -0.007                                                | -0.009       | -0.006       | <0.001  |
| Naringenin-7- <i>O</i> -glucoside | Mar Azul          | Cuban Pepper | -0.004                                                | -0.005       | -0.003       | 0.0001  |
| Naringenin-7- <i>O</i> -glucoside | Tomato paste      | Cuban Pepper | 0.003                                                 | 0.002        | 0.004        | 0.0005  |
| Protocatechuic acid               | Mar Azul          | Tomato paste | -0.001                                                | -0.001       | -0.001       | 0.0008  |
| Quercetin-3- <i>O</i> -glucoside  | Tomato paste      | Cuban Pepper | 0.004                                                 | 0.003        | 0.006        | 0.002   |
| Rutin                             | Mar Azul          | Tomato paste | 0.08                                                  | 0.06         | 0.09         | <0.001  |
| Rutin                             | Mar Azul          | Cuban Pepper | 0.05                                                  | 0.04         | 0.07         | 0.0001  |
| Rutin                             | Tomato paste      | Cuban Pepper | -0.03                                                 | -0.04        | -0.01        | 0.0030  |
